# Supplementary material for: Urine metabolomics reveals new insights into hyperlipidemia and the therapeutic effect of rhubarb
Source: Royal Society of Chemistry journal article supplement (doi:10.1039/c5ay00023h), 2015-01-01
Supplement: c5ay00023h1.pdf [file c5ay00023h1.pdf]

## Supplementary materials

### Urine metabolomics reveals new insights into hyperlipidemia and therapeutic effect of rhubarb

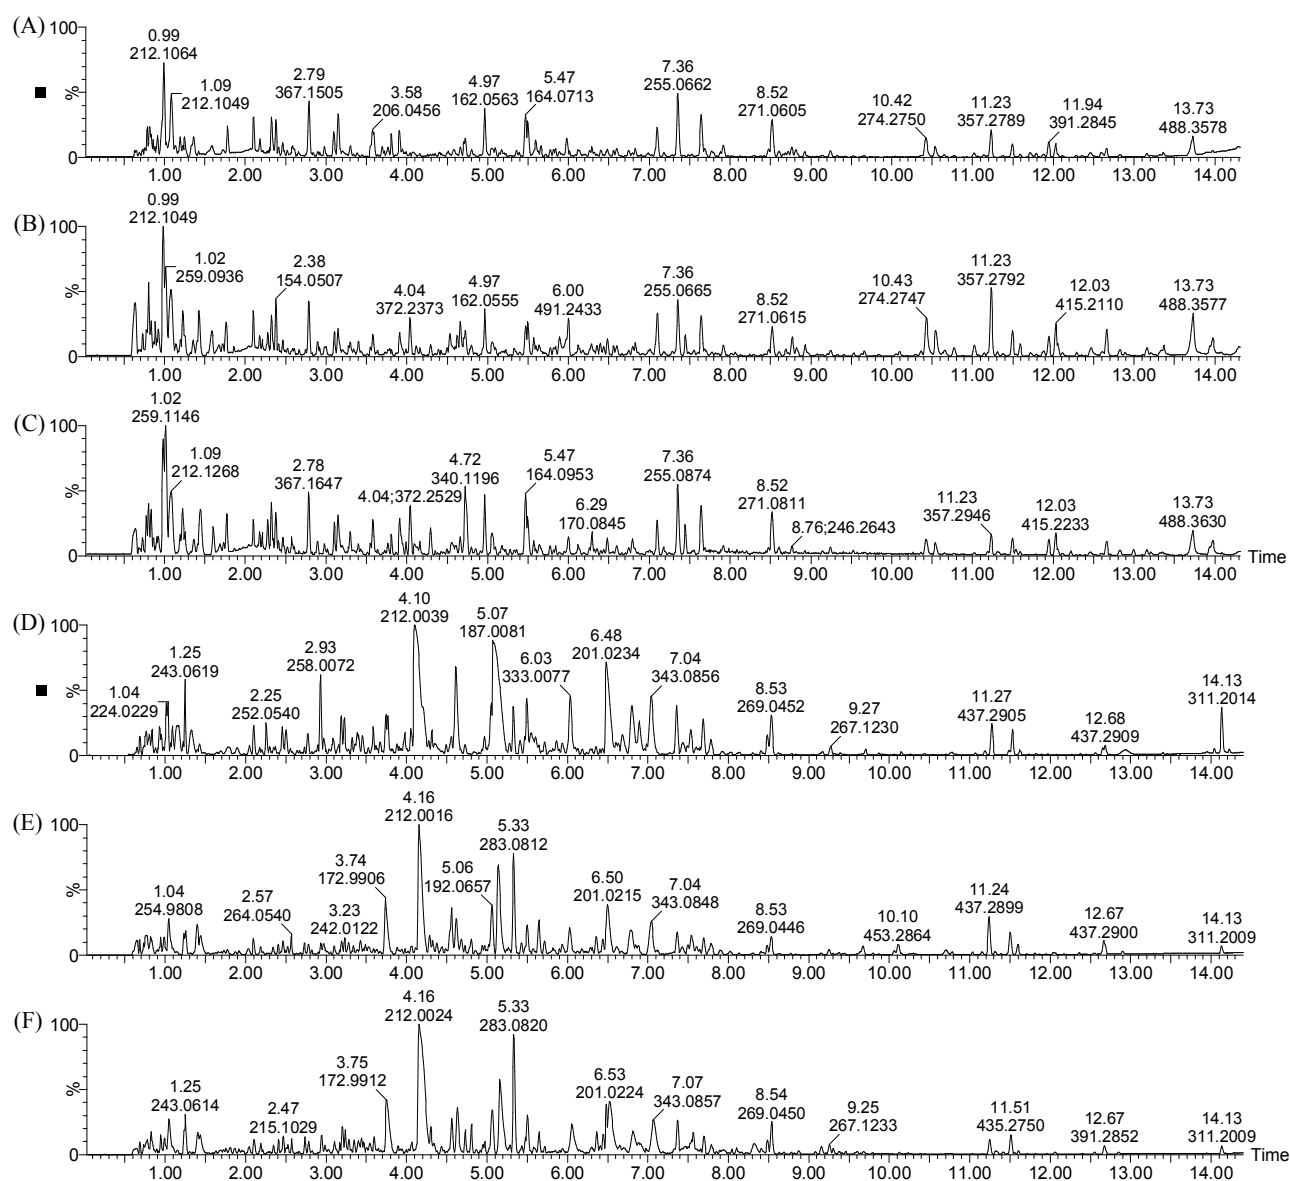

Fig. S1. Base peak intensity (BPI) chromatograms in positive and negative ion modes obtained from UPLC-MS analysis. (A), (B) and (C) represent the BPI chromatograms of the control group, diet-induced hyperlipidemic group and rhubarb-treated hyperlipidemic group in positive ion mode, respectively. (D), (E) and (F) represent BPI chromatogram of control group, diet-induced hyperlipidemic group and rhubarb-treated hyperlipidemic group in negative ion mode, respectively.

**Table S1** All twenty-one pairs of interactions between four biomarkers and seven targets in the diet-induced hyperlipidemic rats

| ID | Biomarkers      | Hyperlipidemia-related targets | Steps of metabolic reactions |
|----|-----------------|--------------------------------|------------------------------|
| 1  | D-Arginine      | F2                             | 0                            |
| 2  | D-Arginine      | LIPE                           | 20                           |
| 3  | D-Arginine      | F5                             | 4                            |
| 4  | D-Arginine      | F7                             | 6                            |
| 5  | D-Arginine      | PROS1                          | 6                            |
| 6  | D-Arginine      | ALB                            | 14                           |
| 7  | D-Arginine      | FASN                           | 10                           |
| 8  | L-Phenylalanine | F2                             | 12                           |
| 9  | L-Phenylalanine | LIPE                           | 14                           |
| 10 | L-Phenylalanine | ALB                            | 6                            |
| 11 | L-Phenylalanine | FASN                           | 10                           |
| 12 | L-Phenylalanine | F5                             | 14                           |
| 13 | Xanthine        | F2                             | 20                           |
| 14 | Xanthine        | LIPE                           | 20                           |
| 15 | Xanthine        | ALB                            | 14                           |
| 16 | Xanthine        | FASN                           | 12                           |
| 17 | Palmitic acid   | F2                             | 16                           |
| 18 | Palmitic acid   | LIPE                           | 16                           |
| 19 | Palmitic acid   | ALB                            | 10                           |
| 20 | Palmitic acid   | FASN                           | 6                            |
| 21 | Palmitic acid   | F5                             | 18                           |

**Table S2** All forty-seven pairs of interactions between fourteen targets and five biomarkers in the diet-induced hyperlipidaemic rats.

| ID | Hyperlipidaemia-related targets | Biomarkers       | Steps of metabolic reactions |
|----|---------------------------------|------------------|------------------------------|
| 1  | FASN                            | Palmitic acid    | 4                            |
| 2  | LIPE                            | Xanthine         | 6                            |
| 3  | LIPE                            | Palmitic acid    | 6                            |
| 4  | BAAT                            | Palmitic acid    | 6                            |
| 5  | ALB                             | Xanthine         | 6                            |
| 6  | ALB                             | Palmitic acid    | 6                            |
| 7  | CYP7A1                          | Palmitic acid    | 6                            |
| 8  | ELOVL1                          | Xanthine         | 6                            |
| 9  | ELOVL1                          | Palmitic acid    | 6                            |
| 10 | APOA1                           | Xanthine         | 8                            |
| 11 | APOA1                           | Palmitic acid    | 8                            |
| 12 | LIPE                            | Phytosphingosine | 8                            |
| 13 | BAAT                            | Xanthine         | 8                            |
| 14 | BAAT                            | Hippuric acid    | 8                            |
| 15 | NPC1L1                          | Palmitic acid    | 8                            |
| 16 | ALB                             | Phytosphingosine | 8                            |
| 17 | CYP7A1                          | Phytosphingosine | 8                            |
| 18 | CYP7A1                          | Xanthine         | 8                            |
| 19 | FASN                            | Xanthine         | 8                            |
| 20 | LSS                             | Palmitic acid    | 8                            |
| 21 | ELOVL1                          | Phytosphingosine | 8                            |
| 22 | ELOVL1                          | Hippuric acid    | 8                            |
| 23 | APOA1                           | Phytosphingosine | 10                           |
| 24 | LIPE                            | Hippuric acid    | 10                           |
| 25 | CYP27A1                         | Hippuric acid    | 10                           |
| 26 | CYP27A1                         | Palmitic acid    | 10                           |
| 27 | BAAT                            | Phytosphingosine | 10                           |
| 28 | NPC1L1                          | Phytosphingosine | 10                           |
| 29 | NPC1L1                          | Xanthine         | 10                           |
| 30 | ALB                             | Hippuric acid    | 10                           |
| 31 | FASN                            | Phytosphingosine | 10                           |
| 32 | FASN                            | Hippuric acid    | 10                           |
| 33 | LSS                             | Phytosphingosine | 10                           |
| 34 | LSS                             | Xanthine         | 10                           |
| 35 | GCG                             | Xanthine         | 10                           |
| 36 | GCG                             | Palmitic acid    | 10                           |
| 37 | F2                              | Xanthine         | 12                           |
| 38 | F2                              | Palmitic acid    | 12                           |
| 39 | APOA1                           | Hippuric acid    | 12                           |
| 40 | CYP27A1                         | Phytosphingosine | 12                           |
| 41 | CYP27A1                         | Xanthine         | 12                           |
| 42 | OSBP                            | Xanthine         | 12                           |
| 43 | OSBP                            | Palmitic acid    | 12                           |

|    |        |                  |    |
|----|--------|------------------|----|
| 44 | LCAT   | Palmitic acid    | 12 |
| 45 | ALB    | Creatinine       | 12 |
| 46 | CYP7A1 | Hippuric acid    | 12 |
| 47 | GCG    | Phytosphingosine | 12 |

---
